# Supplementary material for: Understanding liquefaction in halide perovskites upon methylamine gas exposure
Source: Royal Society of Chemistry journal article supplement (doi:10.1039/d1ra01458g), 2021-01-01
Supplement: d1ra01458g1.pdf [file d1ra01458g1.pdf]

Supporting Information for

## Understanding the Liquefaction in Halide Perovskites upon Methylamine Gas Exposure

Wencai Zhou<sup>a</sup>, Zilong Zheng<sup>\*a</sup>, Yue Lu<sup>\*a</sup>, Manling Sui<sup>a</sup>, Jun Yin<sup>b</sup> and Hui Yan<sup>a</sup>

<sup>a</sup>Faculty of Materials and Manufacturing, Beijing University of Technology, Beijing 100124, China

<sup>b</sup>Division of Physical Science and Engineering, King Abdullah University of Science and Technology, Thuwal 23955-6900, Kingdom of Saudi Arabia

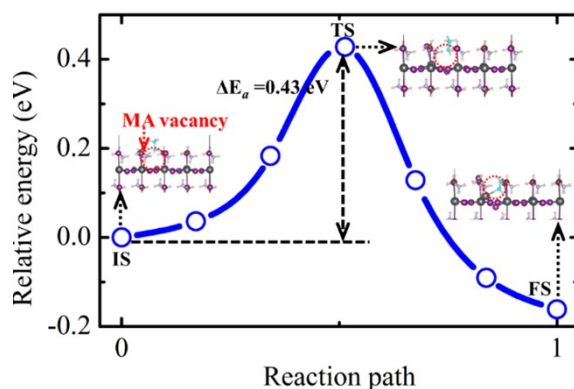

**Fig. S1** Potential energy surface of methylamine gas molecule diffusion process, on the MA-vacancy perovskite surface.

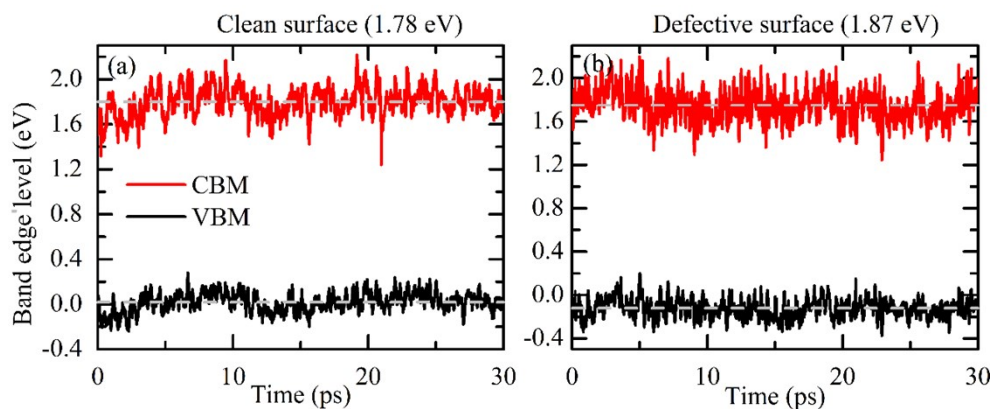

**Fig. S2** Band edge level from AIMD simulation of MAI terminated with pristine-surface (left panel) and defect-surface (right panel). The gray dash line denotes the time averaged value of VBM and CBM.

\*Author to whom correspondence should be addressed. E-mail:

zilong.zheng@bjut.edu.cn, luyue@bjut.edu.cn
